# Supplementary material for: Systematic combinations of major cannabinoid and terpene contents in Cannabis flower and patient outcomes: a proof-of-concept assessment of the Vigil Index of Cannabis Chemovars
Source: J Cannabis Res. 2023 Feb 8;5:4. doi: 10.1186/s42238-022-00170-9 (PMC9906924; doi:10.1186/s42238-022-00170-9)
Supplement: Supplementary file 1 — Additional file 1: Table S1. Frequency of unique chemovar index codes. Table S2. Descriptive statistics for side effects. [file 42238_2022_170_MOESM1_ESM.docx]

Supplementary Materials

**This file includes:**

Tables S1 and S2

**Supplemental Table S1:** Frequency of unique chemovar index codes in the VICC

| VICC Code Frequency Percent | | |
| --- | --- | --- |
| A-70 | 4 | .1 |
| A-72 | 4 | .1 |
| A/B/MA/B/M44 | 47 | .7 |
| A/MA/M21 | 11 | .2 |
| A+-61 | 1 | .0 |
| A++/B++/M++/U++A++/B++/M++/U++ | 7 | .1 |
| A++/C++/L++A++/C++/L++52 | 15 | .2 |
| A++/C++/M++/O++A++/C++/M++/O++ | 8 | .1 |
| A++/M++A++/M++50 | 8 | .1 |
| A+++-60 | 7 | .1 |
| A+++B++70 | 1 | .0 |
| A+++B+80 | 4 | .1 |
| A+++B61 | 4 | .1 |
| A+++C+++60 | 5 | .1 |
| A+++C15 | 1 | .0 |
| A+++M+++51 | 3 | .0 |
| A+++R+++70 | 4 | .1 |
| A++L+61 | 9 | .1 |
| A+B50 | 3 | .0 |
| A+C/N/L61 | 40 | .6 |
| A+M+60 | 1 | .0 |
| A+M+61 | 9 | .1 |
| A+M61 | 24 | .4 |
| AC50 | 8 | .1 |
| AL23 | 8 | .1 |
| AL26 | 6 | .1 |
| AL50 | 12 | .2 |
| AM45 | 15 | .2 |
| AM51 | 15 | .2 |
| AM60 | 8 | .1 |
| AM71 | 4 | .1 |
| B/C/R/N/L/M41 | 2 | .0 |
| B++-71 | 1 | .0 |
| B++/C++/M++B++/C++/M++52 | 7 | .1 |
| B++/L++/M++B++/L++/M++62 | 24 | .4 |
| B+++/M+++B+++/M+++51 | 11 | .2 |
| B+++B+++60 | 4 | .1 |
| B+++C++44 | 4 | .1 |
| B+++M+++50 | 9 | .1 |
| B+++M+++51 | 3 | .0 |
| B+A+61 | 2 | .0 |
| B+L60 | 8 | .1 |
| B+L82 | 5 | .1 |
| B+M+70 | 2 | .0 |
| B+M10 | 5 | .1 |
| B+M60 | 3 | .0 |
| BC/R80 | 1 | .0 |
| BM70 | 4 | .1 |
| C-35 | 6 | .1 |
| C/LC/L60 | 29 | .5 |
| C/LM51 | 8 | .1 |
| C/LM60 | 3 | .0 |
| C/LM70 | 8 | .1 |
| C/M-61 | 1 | .0 |
| C/N/L/MC/N/L/M80 | 20 | .3 |
| C+/L+M70 | 4 | .1 |
| C+/M+C+/M+60 | 9 | .1 |
| C+/N+C+/N+61 | 8 | .1 |
| C++-70 | 1 | .0 |
| C++/H++C++/H++70 | 16 | .3 |
| C++/L++/M++-61 | 1 | .0 |
| C++/L++/M++C++/L++/M++52 | 8 | .1 |
| C++/M++/T++C++/M++/T++12 | 27 | .4 |
| C++/N++/L++/M++-80 | 3 | .0 |
| C+++-60 | 4 | .1 |
| C+++-61 | 4 | .1 |
| C+++-70 | 2 | .0 |
| C+++/M+++-80 | 1 | .0 |
| C+++C+++60 | 7 | .1 |
| C+++H++60 | 4 | .1 |
| C+++H++70 | 3 | .0 |
| C+++J60 | 1 | .0 |
| C+++M+++61 | 1 | .0 |
| C+++O+++61 | 3 | .0 |
| C++H+80 | 1 | .0 |
| C++L++33 | 3 | .0 |
| C++L60 | 3 | .0 |
| C++M+60 | 6 | .1 |
| C++M+70 | 15 | .2 |
| C++M+80 | 1 | .0 |
| C++N50 | 2 | .0 |
| C+H10 | 3 | .0 |
| C+H45 | 16 | .3 |
| C+H61 | 2 | .0 |
| C+H70 | 26 | .4 |
| C+H71 | 12 | .2 |
| C+H81 | 6 | .1 |
| C+L+50 | 6 | .1 |
| C+L+51 | 5 | .1 |
| C+L+70 | 17 | .3 |
| C+L+71 | 8 | .1 |
| C+L+80 | 4 | .1 |
| C+L50 | 12 | .2 |
| C+L60 | 11 | .2 |
| C+L61 | 11 | .2 |
| C+L70 | 22 | .3 |
| C+L71 | 6 | .1 |
| C+L80 | 6 | .1 |
| C+L81 | 8 | .1 |
| C+M+70 | 8 | .1 |
| C+M+71 | 6 | .1 |
| C+M+80 | 3 | .0 |
| C+M50 | 11 | .2 |
| C+M60 | 5 | .1 |
| C+M61 | 1 | .0 |
| C+M81 | 8 | .1 |
| C+N70 | 11 | .2 |
| C+T62 | 39 | .6 |
| CA15 | 8 | .1 |
| CH50 | 6 | .1 |
| CH61 | 21 | .3 |
| CL10 | 9 | .1 |
| CL36 | 5 | .1 |
| CL50 | 3 | .0 |
| CL60 | 21 | .3 |
| CL61 | 5 | .1 |
| CL70 | 24 | .4 |
| CL71 | 8 | .1 |
| CL80 | 4 | .1 |
| CL81 | 44 | .7 |
| CM38 | 7 | .1 |
| CM50 | 25 | .4 |
| CM60 | 30 | .5 |
| CM61 | 9 | .1 |
| CM70 | 21 | .3 |
| CN70 | 3 | .0 |
| CO51 | 13 | .2 |
| CT51 | 128 | 2.0 |
| CT60 | 9 | .1 |
| DE46 | 2 | .0 |
| E-11 | 2 | .0 |
| E+B+70 | 6 | .1 |
| E+L60 | 2 | .0 |
| F+++-51 | 4 | .1 |
| F+++-60 | 1 | .0 |
| G+M+50 | 1 | .0 |
| G+M+80 | 4 | .1 |
| H++-52 | 1 | .0 |
| H+++-52 | 1 | .0 |
| H+++L+++50 | 1 | .0 |
| H+++M+++50 | 1 | .0 |
| H+++M+++81 | 2 | .0 |
| H+++M++61 | 8 | .1 |
| H+++N++60 | 3 | .0 |
| H+C+34 | 2 | .0 |
| H+C34 | 4 | .1 |
| H+L+60 | 8 | .1 |
| J+++-60 | 8 | .1 |
| J+++-70 | 4 | .1 |
| J+++-71 | 4 | .1 |
| J+N+62 | 3 | .0 |
| L-60 | 5 | .1 |
| L/MC60 | 10 | .2 |
| L/ML/M70 | 29 | .5 |
| L+++-70 | 1 | .0 |
| L+++/T+++L+++/T+++61 | 1 | .0 |
| L+++C+++60 | 3 | .0 |
| L+++C+++63 | 3 | .0 |
| L+++M+++61 | 5 | .1 |
| L+++M++50 | 12 | .2 |
| L+++M++70 | 1 | .0 |
| L+++N++60 | 13 | .2 |
| L+++R+++60 | 8 | .1 |
| L++C++/O++80 | 1 | .0 |
| L++C++61 | 5 | .1 |
| L++C+60 | 12 | .2 |
| L++C+70 | 4 | .1 |
| L++C+71 | 8 | .1 |
| L++C81 | 4 | .1 |
| L++M+51 | 7 | .1 |
| L++M+60 | 5 | .1 |
| L+A/C70 | 14 | .2 |
| L+B/N81 | 1 | .0 |
| L+B61 | 8 | .1 |
| L+C/M60 | 2 | .0 |
| L+C/M81 | 39 | .6 |
| L+C+70 | 12 | .2 |
| L+C+80 | 78 | 1.2 |
| L+C10 | 8 | .1 |
| L+C51 | 129 | 2.0 |
| L+C60 | 20 | .3 |
| L+C61 | 2 | .0 |
| L+C70 | 22 | .3 |
| L+C80 | 1 | .0 |
| L+C81 | 6 | .1 |
| L+M/O70 | 12 | .2 |
| L+M+70 | 13 | .2 |
| L+M+80 | 2 | .0 |
| L+M+81 | 11 | .2 |
| L+M10 | 7 | .1 |
| L+M21 | 6 | .1 |
| L+M50 | 17 | .3 |
| L+M61 | 10 | .2 |
| L+M71 | 8 | .1 |
| L+N45 | 40 | .6 |
| L+N70 | 5 | .1 |
| L+N80 | 2 | .0 |
| L+N81 | 3 | .0 |
| LA51 | 3 | .0 |
| LA84 | 1 | .0 |
| LB/N81 | 5 | .1 |
| LC/E61 | 8 | .1 |
| LC/M70 | 10 | .2 |
| LC10 | 7 | .1 |
| LC50 | 17 | .3 |
| LC51 | 16 | .3 |
| LC60 | 26 | .4 |
| LC70 | 26 | .4 |
| LC71 | 3 | .0 |
| LC80 | 18 | .3 |
| LC81 | 1 | .0 |
| LM/O70 | 6 | .1 |
| LM40 | 14 | .2 |
| LM50 | 15 | .2 |
| LM51 | 2 | .0 |
| LM60 | 231 | 3.7 |
| LM61 | 9 | .1 |
| LM70 | 23 | .4 |
| LN60 | 24 | .4 |
| LN70 | 4 | .1 |
| LR70 | 9 | .1 |
| M-14 | 17 | .3 |
| M-34 | 1 | .0 |
| M-61 | 2 | .0 |
| M-70 | 2 | .0 |
| M/TM/T44 | 91 | 1.4 |
| M+-60 | 13 | .2 |
| M+-71 | 1 | .0 |
| M++-15 | 1 | .0 |
| M++-60 | 15 | .2 |
| M++-80 | 15 | .2 |
| M++/T++C/L51 | 7 | .1 |
| M+++-80 | 5 | .1 |
| M+++A+++51 | 11 | .2 |
| M+++A+++61 | 1 | .0 |
| M+++A++61 | 1 | .0 |
| M+++A+70 | 4 | .1 |
| M+++A60 | 11 | .2 |
| M+++L+++60 | 5 | .1 |
| M+++L++60 | 2 | .0 |
| M+++L50 | 4 | .1 |
| M+++L60 | 4 | .1 |
| M+++L70 | 7 | .1 |
| M+++M+++60 | 8 | .1 |
| M+++N61 | 12 | .2 |
| M+++O+++70 | 3 | .0 |
| M+++O70 | 6 | .1 |
| M+++O80 | 12 | .2 |
| M++A/O70 | 7 | .1 |
| M++A++70 | 1 | .0 |
| M++A+33 | 7 | .1 |
| M++A10 | 4 | .1 |
| M++A34 | 11 | .2 |
| M++A35 | 16 | .3 |
| M++A45 | 1 | .0 |
| M++A50 | 42 | .7 |
| M++A60 | 16 | .3 |
| M++A76 | 12 | .2 |
| M++A80 | 8 | .1 |
| M++C/L81 | 1 | .0 |
| M++C+20 | 2 | .0 |
| M++C+70 | 17 | .3 |
| M++C+80 | 25 | .4 |
| M++C50 | 7 | .1 |
| M++C56 | 6 | .1 |
| M++C60 | 7 | .1 |
| M++C70 | 9 | .1 |
| M++C80 | 11 | .2 |
| M++L+60 | 4 | .1 |
| M++L+70 | 5 | .1 |
| M++L+71 | 19 | .3 |
| M++L+80 | 1 | .0 |
| M++L+81 | 7 | .1 |
| M++L60 | 10 | .2 |
| M++L61 | 8 | .1 |
| M++L62 | 66 | 1.0 |
| M++L70 | 5 | .1 |
| M++L71 | 4 | .1 |
| M++N+81 | 5 | .1 |
| M++O+80 | 8 | .1 |
| M++O10 | 3 | .0 |
| M++O60 | 26 | .4 |
| M++R70 | 16 | .3 |
| M+A/B/C/N/L34 | 7 | .1 |
| M+A/C/L70 | 1 | .0 |
| M+A/H/L15 | 40 | .6 |
| M+A/L15 | 1 | .0 |
| M+A/N50 | 2 | .0 |
| M+A/R60 | 1 | .0 |
| M+A+60 | 10 | .2 |
| M+A+70 | 8 | .1 |
| M+A+80 | 16 | .3 |
| M+A15 | 6 | .1 |
| M+A33 | 27 | .4 |
| M+A34 | 11 | .2 |
| M+A40 | 91 | 1.4 |
| M+A50 | 212 | 3.4 |
| M+A60 | 22 | .3 |
| M+AR60 | 2 | .0 |
| M+C+50 | 2 | .0 |
| M+C+60 | 1 | .0 |
| M+C+70 | 7 | .1 |
| M+C+80 | 14 | .2 |
| M+C+81 | 10 | .2 |
| M+C10 | 7 | .1 |
| M+C16 | 17 | .3 |
| M+C33 | 5 | .1 |
| M+C50 | 77 | 1.2 |
| M+C51 | 98 | 1.6 |
| M+C60 | 38 | .6 |
| M+C61 | 11 | .2 |
| M+C70 | 22 | .3 |
| M+C71 | 17 | .3 |
| M+C80 | 13 | .2 |
| M+D81 | 1 | .0 |
| M+F+70 | 9 | .1 |
| M+J35 | 3 | .0 |
| M+L+50 | 9 | .1 |
| M+L+60 | 17 | .3 |
| M+L+70 | 4 | .1 |
| M+L+80 | 1 | .0 |
| M+L+81 | 21 | .3 |
| M+L10 | 6 | .1 |
| M+L35 | 15 | .2 |
| M+L50 | 10 | .2 |
| M+L60 | 64 | 1.0 |
| M+L70 | 19 | .3 |
| M+L71 | 2 | .0 |
| M+L80 | 12 | .2 |
| M+N33 | 5 | .1 |
| M+N34 | 4 | .1 |
| M+N54 | 3 | .0 |
| M+N60 | 1 | .0 |
| M+N61 | 1 | .0 |
| M+O41 | 6 | .1 |
| M+O70 | 8 | .1 |
| M+R10 | 8 | .1 |
| M+R50 | 5 | .1 |
| M+R60 | 1 | .0 |
| M+T+61 | 9 | .1 |
| M+T15 | 8 | .1 |
| M+T40 | 1 | .0 |
| M+T50 | 7 | .1 |
| M+T60 | 1 | .0 |
| M+T61 | 20 | .3 |
| MA/L/O70 | 5 | .1 |
| MA10 | 1 | .0 |
| MA16 | 1 | .0 |
| MA26 | 1 | .0 |
| MA50 | 127 | 2.0 |
| MA51 | 1 | .0 |
| MA61 | 11 | .2 |
| MA72 | 8 | .1 |
| MB50 | 5 | .1 |
| MB51 | 2 | .0 |
| MB71 | 1 | .0 |
| MC/L16 | 4 | .1 |
| MC14 | 1 | .0 |
| MC28 | 1 | .0 |
| MC35 | 2 | .0 |
| MC40 | 6 | .1 |
| MC43 | 4 | .1 |
| MC50 | 38 | .6 |
| MC51 | 5 | .1 |
| MC54 | 11 | .2 |
| MC60 | 17 | .3 |
| MC61 | 223 | 3.5 |
| MC62 | 211 | 3.3 |
| MC70 | 9 | .1 |
| MC72 | 5 | .1 |
| MC80 | 22 | .3 |
| MH50 | 5 | .1 |
| ML50 | 17 | .3 |
| ML60 | 70 | 1.1 |
| ML70 | 23 | .4 |
| MN64 | 4 | .1 |
| MO/T50 | 8 | .1 |
| MO10 | 1 | .0 |
| MO71 | 8 | .1 |
| MT40 | 1 | .0 |
| MT50 | 81 | 1.3 |
| MT55 | 2 | .0 |
| MT60 | 15 | .2 |
| MT61 | 21 | .3 |
| N-51 | 1 | .0 |
| N++/L++/E++N++/L++/E++51 | 8 | .1 |
| N++/L++/M++N++/L++/M++70 | 7 | .1 |
| N+++-60 | 8 | .1 |
| N+++-61 | 1 | .0 |
| N+++-71 | 4 | .1 |
| N+++C+++81 | 4 | .1 |
| N+++L+++60 | 3 | .0 |
| N+++M+++71 | 4 | .1 |
| N++L++43 | 5 | .1 |
| N++N++52 | 8 | .1 |
| N+L70 | 5 | .1 |
| N+M+71 | 1 | .0 |
| NB71 | 7 | .1 |
| NC10 | 12 | .2 |
| NC50 | 3 | .0 |
| O+++-61 | 4 | .1 |
| O+++L++61 | 7 | .1 |
| O++M++35 | 16 | .3 |
| O++M++60 | 2 | .0 |
| O++M+70 | 12 | .2 |
| O+L+80 | 3 | .0 |
| O+M+70 | 13 | .2 |
| OM71 | 8 | .1 |
| P++-47 | 3 | .0 |
| P++-61 | 3 | .0 |
| P+++-51 | 1 | .0 |
| P+M+60 | 4 | .1 |
| R++/L++/M++R++/L++/M++52 | 12 | .2 |
| R++/M++R++/M++60 | 2 | .0 |
| R++/O++/T++R++/O++/T++52 | 12 | .2 |
| R+++/M+++/T+++R+++/M+++/T+++61 | 9 | .1 |
| R+++R+++80 | 7 | .1 |
| R+B+51 | 10 | .2 |
| R+C60 | 87 | 1.4 |
| R+H80 | 1 | .0 |
| R+L60 | 6 | .1 |
| R+L71 | 2 | .0 |
| RB51 | 7 | .1 |
| RH41 | 2 | .0 |
| RH60 | 10 | .2 |
| RL50 | 15 | .2 |
| RL60 | 5 | .1 |
| RM60 | 11 | .2 |
| RM70 | 9 | .1 |
| RN71 | 2 | .0 |
| RR80 | 8 | .1 |
| T+++-73 | 4 | .1 |
| T+++M70 | 40 | .6 |
| T++C10 | 4 | .1 |
| T++C60 | 10 | .2 |
| T++C70 | 19 | .3 |
| T++L50 | 5 | .1 |
| T++L70 | 149 | 2.4 |
| T++M+60 | 14 | .2 |
| T++M+61 | 9 | .1 |
| T++M+70 | 4 | .1 |
| T++M+80 | 1 | .0 |
| T++M60 | 2 | .0 |
| T++M61 | 19 | .3 |
| T++M70 | 9 | .1 |
| T+C51 | 8 | .1 |
| T+C70 | 11 | .2 |
| T+L60 | 222 | 3.5 |
| T+M/O82 | 6 | .1 |
| T+M33 | 5 | .1 |
| T+M34 | 3 | .0 |
| T+M50 | 1 | .0 |
| T+M60 | 17 | .3 |
| T+M61 | 10 | .2 |
| T+M70 | 12 | .2 |
| T+O+61 | 1 | .0 |
| T+O50 | 17 | .3 |
| T+O60 | 6 | .1 |
| TA/N40 | 2 | .0 |
| TA50 | 5 | .1 |
| TA60 | 3 | .0 |
| TC/L/M/O80 | 7 | .1 |
| TC60 | 9 | .1 |
| TC61 | 3 | .0 |
| TH62 | 11 | .2 |
| TL50 | 8 | .1 |
| TL60 | 5 | .1 |
| TM33 | 5 | .1 |
| TM40 | 15 | .2 |
| TM51 | 15 | .2 |
| TM60 | 8 | .1 |
| TM61 | 29 | .5 |
| TM71 | 11 | .2 |
| TM73 | 5 | .1 |
| TO50 | 19 | .3 |
| TR50 | 1 | .0 |
| TR71 | 3 | .0 |
| V+C60 | 5 | .1 |
| Total | 6309 | 100.0 |

Note. The first two places in the four unit Vigil Index of Cannabis Chemovars (VICC) are the alphabetic symbols for 20 terpenes, with the highest concentrated terpene(s) in the first place and the terpene(s) with the 2nd highest concentration in the second place. The relative magnitudes of each units concentration levels are indicated with the presence of superscript(s) “+” following the alphabetic symbol: (no superscript) = 0.01 to 0.49%/dry wt; “+” = 0.50% to 0.99%/dry wt; “++” = 1.00% to 1.99%/dry wt; and “+++” = 2.00% to 3.00%/dry wt. The “-” indicates the absence of a 2nd identified terpene and a “/” between terpenes in the 1st and 2nd places indicate exactly matched concentration levels. The third place unit indicates THC levels: 1= 0-.9%; 2 = 1-4.9%; 3 = 5-9.9%; 4 = 10-14.9%; 5 = 15-19.9%; 6 = 20-24.9%; 7 = 25-29.9%; 8 = 30-35%., and the fourth place unit indicates CBD levels: 0 = 0%; 1 = .01-.9%; 2 = 1-4.9%; 3 = 5-9.9%; 4 = 10-14.9%; 5 = 15-19.9%; 6 = 20-24.9%; 7 = 25-29.9%; 8 = 30-35%.

**Supplemental Table 2:** Descriptive statistics for side effects

| **Side Effect** | **N sessions** | **% Sessions Reporting** | **Category** |
| --- | --- | --- | --- |
| Anxious | 210 | 3.3% | Negative |
| Clumsy | 509 | 8.1% | Negative |
| Confused | 126 | 2.0% | Negative |
| Coughing | 898 | 14.2% | Negative |
| Dizzy | 280 | 4.4% | Negative |
| Dry Mouth | 2562 | 40.6% | Negative |
| Foggy | 537 | 8.5% | Negative |
| Forgetful | 537 | 8.5% | Negative |
| Headache | 251 | 4.0% | Negative |
| Irritable | 243 | 3.9% | Negative |
| Nausea | 86 | 1.4% | Negative |
| Paranoid | 108 | 1.7% | Negative |
| Rapid Pulse | 193 | 3.1% | Negative |
| Red Eyes | 1692 | 26.8% | Negative |
| Restless | 511 | 8.1% | Negative |
| Scattered | 893 | 14.2% | Negative |
| Unmotivated | 477 | 7.6% | Negative |
| Active | 532 | 8.4% | Positive |
| Chill | 3979 | 63.1% | Positive |
| Clear | 1045 | 16.6% | Positive |
| Comfy | 1826 | 28.9% | Positive |
| Creative | 709 | 11.2% | Positive |
| Dreamy | 2319 | 36.8% | Positive |
| Energetic | 697 | 11.0% | Positive |
| Focused | 1050 | 16.6% | Positive |
| Frisky | 420 | 6.7% | Positive |
| Grateful | 1419 | 22.5% | Positive |
| Great | 1138 | 18.0% | Positive |
| Happy | 1688 | 26.8% | Positive |
| Light | 1807 | 28.6% | Positive |
| Optimistic | 1673 | 26.5% | Positive |
| Peaceful | 2776 | 44.0% | Positive |
| Productive | 515 | 8.2% | Positive |
| Reflective | 1235 | 19.6% | Positive |
| Relaxed | 3543 | 56.2% | Positive |
| Tuned | 958 | 15.2% | Positive |
| Couchlocked | 699 | 11.1% | Context-Specific |
| Distracted | 536 | 8.5% | Context-Specific |
| High | 3555 | 56.3% | Context-Specific |
| Hungry | 844 | 13.4% | Context-Specific |
| Silly | 1010 | 16.0% | Context-Specific |
| Sleepy | 1298 | 20.6% | Context-Specific |
| Talkative | 329 | 5.2% | Context-Specific |
| Thinky | 1438 | 22.8% | Context-Specific |
| Thirsty | 1471 | 23.3% | Context-Specific |
| Tingly | 2083 | 33.0% | Context-Specific |
| Visuals | 542 | 8.6% | Context-Specific |

Notes: Side effects are categorized according to their visceral experiences

under varying circumstances.
